# Supplementary material for: Aggregation-induced emission spectra of triphenylamine salicylaldehyde derivatives via excited-state intramolecular proton transfer revealed by molecular spectral and dynamics simulations
Source: Royal Society of Chemistry journal article supplement (doi:10.1039/d1ra07388e), 2021-01-01
Supplement: d1ra07388e1.pdf [file d1ra07388e1.pdf]

## Support information for

# Aggregation-induced emission spectra of triphenylamine salicylaldehyde derivatives via excited-state intramolecular proton transfer revealed by molecular spectral and dynamic simulations

Qing Zhang,<sup>a</sup> Yuanyuan Li,<sup>a</sup> Zexing Cao<sup>\*a</sup> and Chaoyuan Zhu<sup>\*cb</sup>

<sup>a</sup>*State Key Laboratory of Physical Chemistry of Solid Surfaces and Fujian Provincial Key Laboratory of Theoretical and Computational Chemistry, College of Chemistry and Chemical Engineering, Xiamen University, Xiamen 360015, China.*

<sup>b</sup>*Department of Applied Chemistry and Institute of Molecular Science, National Chiao-Tung University, Hsinchu 30010, Taiwan.*

<sup>c</sup>*Department of Applied Chemistry and Center for Emergent Functional Matter Science, National Yang Ming Chiao Tung University, Hsinchu 30010, Taiwan.*

**Corresponding Authors:**

**\*E-mails: [zxcao@xmu.edu.cn](mailto:zxcao@xmu.edu.cn) and [cyzhu@mail.nctu.edu.tw](mailto:cyzhu@mail.nctu.edu.tw)**

**Table S1.** Cartesian coordinates of QM region atoms for S<sub>0</sub> (enol and keto forms) states for TS in its ONIOM model, simulated by using the ONIOM-EE(BMK/6-31G(d,p):UFF) approach.

| enol |            |             | keto        |   |             |             |             |
|------|------------|-------------|-------------|---|-------------|-------------|-------------|
| N    | 0.28924700 | 0.51469500  | -0.55735900 | N | 20.11400000 | 14.22000000 | 12.23000000 |
| O    | 1.26095400 | 5.08248300  | -1.55798500 | O | 21.82700000 | 9.83400000  | 11.51400000 |
| O    | 0.33797700 | 6.93390600  | -0.54209700 | O | 23.62800000 | 8.93800000  | 13.22100000 |
| C    | 0.79197000 | 2.83934300  | -1.04603800 | C | 20.98000000 | 11.99300000 | 11.88000000 |
| C    | 0.49015800 | 4.19879600  | -0.92385500 | C | 21.81500000 | 10.95600000 | 12.25800000 |
| C    | 0.01263600 | 1.86952000  | -0.41775800 | C | 20.95100000 | 13.17700000 | 12.60900000 |
| C    | 0.70294600 | -0.46548600 | -0.25912300 | C | 20.40400000 | 15.56200000 | 12.64200000 |
| C    | 1.13270800 | 2.27875500  | 0.36085600  | C | 21.78000000 | 13.31100000 | 13.73800000 |
| C    | 1.63625500 | 0.06221300  | -0.66643500 | C | 18.86600000 | 13.98000000 | 11.58200000 |
| C    | 0.50518200 | -1.37027300 | 0.79082000  | C | 19.48500000 | 16.28000000 | 13.38100000 |
| C    | 0.63368100 | 4.61291400  | -0.14925300 | C | 22.64700000 | 11.08300000 | 13.38300000 |
| C    | 1.42211000 | 3.62557800  | 0.47579900  | C | 22.60800000 | 12.28400000 | 14.09200000 |
| C    | 0.96856000 | 6.02127900  | -0.01698700 | C | 23.53500000 | 10.02200000 | 13.77900000 |
| C    | 2.88811500 | -1.43575400 | -0.67426600 | C | 21.89600000 | 17.43000000 | 12.72700000 |
| C    | 1.89226600 | -0.51094800 | -0.99925400 | C | 21.60900000 | 16.14400000 | 12.30000000 |
| C    | 1.95735300 | -0.98611200 | -1.54224300 | C | 18.45400000 | 14.77700000 | 10.54000000 |
| C    | 1.49808300 | -2.30110100 | 1.10028400  | C | 19.78600000 | 17.56500000 | 13.78600000 |
| C    | 2.69858700 | -2.33578500 | 0.38177300  | C | 20.99300000 | 18.14000000 | 13.46900000 |
| C    | 2.63220300 | 0.61484900  | 0.15218000  | C | 18.02400000 | 12.98300000 | 12.03800000 |
| C    | 4.26274400 | -0.91921500 | -0.77249000 | C | 16.37800000 | 13.57400000 | 10.42200000 |
| C    | 3.26613000 | -1.48031400 | -1.58100700 | C | 17.20400000 | 14.56700000 | 9.96800000  |
| C    | 3.94288000 | 0.13660200  | 0.08843200  | C | 16.78900000 | 12.78300000 | 11.45600000 |
| H    | 1.64622300 | 2.54729600  | -1.64542600 | H | 20.45900000 | 11.90000000 | 11.11300000 |
| H    | 2.27673300 | 3.94821700  | 1.06798200  | H | 23.21500000 | 12.35000000 | 14.88700000 |
| H    | 0.41959000 | -1.33095800 | 1.35858100  | H | 18.64500000 | 15.87600000 | 13.61300000 |
| H    | 1.73441400 | 1.53612800  | 0.87151000  | H | 21.77100000 | 14.09800000 | 14.23600000 |
| H    | 2.02649300 | 0.19053300  | -1.81349900 | H | 22.22600000 | 15.60200000 | 11.77700000 |
| H    | 3.46985800 | -3.05540900 | 0.64290600  | H | 21.19400000 | 19.12200000 | 13.79000000 |
| H    | 2.34912000 | 1.41140300  | 0.83120300  | H | 18.32000000 | 12.44700000 | 12.82300000 |
| H    | 3.80423700 | -1.45542600 | -1.25881700 | H | 22.71900000 | 17.82000000 | 12.46200000 |
| H    | 1.17564500 | -1.40899100 | -2.16743700 | H | 19.01600000 | 15.45800000 | 10.27600000 |
| H    | 1.85947700 | 6.25183200  | 0.60249700  | H | 24.09300000 | 10.23300000 | 14.60000000 |
| H    | 1.33085700 | -2.98970600 | 1.91787700  | H | 19.11800000 | 18.04500000 | 14.25900000 |
| H    | 5.27299900 | -1.31424500 | -0.80129100 | H | 15.41400000 | 13.38800000 | 10.05000000 |
| H    | 3.51561000 | -2.31151300 | -2.23458400 | H | 16.99400000 | 15.12000000 | 9.33500000  |
| H    | 4.70865700 | 0.56865100  | 0.72827500  | H | 16.22600000 | 12.06800000 | 11.76700000 |
| H    | 0.88993800 | 5.97527000  | -1.38922100 | H | 22.97029472 | 9.14611154  | 12.43951992 |

**Table S2.** Cartesian coordinates of QM region atoms for S<sub>1</sub> (enol\* and keto\* forms) states for TS in its ONIOM model, simulated by using the ONIOM-EE((TD)BMK/6-31G(d,p):UFF approach.

| enol* |             |             | keto*       |   |             |             |             |
|-------|-------------|-------------|-------------|---|-------------|-------------|-------------|
| N     | 0.28924700  | 0.51469500  | -0.55735900 | N | 0.28924700  | 0.51469500  | -0.55735900 |
| O     | 1.26095400  | 5.08248300  | -1.55798500 | O | 1.26095400  | 5.08248300  | -1.55798500 |
| O     | -0.33797700 | 6.93390600  | -0.54209700 | O | -0.33797700 | 6.93390600  | -0.54209700 |
| C     | 0.79197000  | 2.83934300  | -1.04603800 | C | 0.79197000  | 2.83934300  | -1.04603800 |
| C     | 0.49015800  | 4.19879600  | -0.92385500 | C | 0.49015800  | 4.19879600  | -0.92385500 |
| C     | -0.01263600 | 1.86952000  | -0.41775800 | C | -0.01263600 | 1.86952000  | -0.41775800 |
| C     | -0.70294600 | -0.46548600 | -0.25912300 | C | -0.70294600 | -0.46548600 | -0.25912300 |
| C     | -1.13270800 | 2.27875500  | 0.36085600  | C | -1.13270800 | 2.27875500  | 0.36085600  |
| C     | 1.63625500  | 0.06221300  | -0.66643500 | C | 1.63625500  | 0.06221300  | -0.66643500 |
| C     | -0.50518200 | -1.37027300 | 0.79082000  | C | -0.50518200 | -1.37027300 | 0.79082000  |
| C     | -0.63368100 | 4.61291400  | -0.14925300 | C | -0.63368100 | 4.61291400  | -0.14925300 |
| C     | -1.42211000 | 3.62557800  | 0.47579900  | C | -1.42211000 | 3.62557800  | 0.47579900  |
| C     | -0.96856000 | 6.02127900  | -0.01698700 | C | -0.96856000 | 6.02127900  | -0.01698700 |
| C     | -2.88811500 | -1.43575400 | -0.67426600 | C | -2.88811500 | -1.43575400 | -0.67426600 |
| C     | -1.89226600 | -0.51094800 | -0.99925400 | C | -1.89226600 | -0.51094800 | -0.99925400 |
| C     | 1.95735300  | -0.98611200 | -1.54224300 | C | 1.95735300  | -0.98611200 | -1.54224300 |
| C     | -1.49808300 | -2.30110100 | 1.10028400  | C | -1.49808300 | -2.30110100 | 1.10028400  |
| C     | -2.69858700 | -2.33578500 | 0.38177300  | C | -2.69858700 | -2.33578500 | 0.38177300  |
| C     | 2.63220300  | 0.61484900  | 0.15218000  | C | 2.63220300  | 0.61484900  | 0.15218000  |
| C     | 4.26274400  | -0.91921500 | -0.77249000 | C | 4.26274400  | -0.91921500 | -0.77249000 |
| C     | 3.26613000  | -1.48031400 | -1.58100700 | C | 3.26613000  | -1.48031400 | -1.58100700 |
| C     | 3.94288000  | 0.13660200  | 0.08843200  | C | 3.94288000  | 0.13660200  | 0.08843200  |
| H     | 1.64622300  | 2.54729600  | -1.64542600 | H | 1.64622300  | 2.54729600  | -1.64542600 |
| H     | -2.27673300 | 3.94821700  | 1.06798200  | H | -2.27673300 | 3.94821700  | 1.06798200  |
| H     | 0.41959000  | -1.33095800 | 1.35858100  | H | 0.41959000  | -1.33095800 | 1.35858100  |
| H     | -1.73441400 | 1.53612800  | 0.87151000  | H | -1.73441400 | 1.53612800  | 0.87151000  |
| H     | -2.02649300 | 0.19053300  | -1.81349900 | H | -2.02649300 | 0.19053300  | -1.81349900 |
| H     | -3.46985800 | -3.05540900 | 0.64290600  | H | -3.46985800 | -3.05540900 | 0.64290600  |
| H     | 2.34912000  | 1.41140300  | 0.83120300  | H | 2.34912000  | 1.41140300  | 0.83120300  |
| H     | -3.80423700 | -1.45542600 | -1.25881700 | H | -3.80423700 | -1.45542600 | -1.25881700 |
| H     | 1.17564500  | -1.40899100 | -2.16743700 | H | 1.17564500  | -1.40899100 | -2.16743700 |
| H     | -1.85947700 | 6.25183200  | 0.60249700  | H | -1.85947700 | 6.25183200  | 0.60249700  |
| H     | -1.33085700 | -2.98970600 | 1.91787700  | H | -1.33085700 | -2.98970600 | 1.91787700  |
| H     | 5.27299900  | -1.31424500 | -0.80129100 | H | 5.27299900  | -1.31424500 | -0.80129100 |
| H     | 3.51561000  | -2.31151300 | -2.23458400 | H | 3.51561000  | -2.31151300 | -2.23458400 |
| H     | 4.70865700  | 0.56865100  | 0.72827500  | H | 4.70865700  | 0.56865100  | 0.72827500  |
| H     | 0.88993800  | 5.97527000  | -1.38922100 | H | 0.36044827  | 6.38864382  | -1.02393231 |

**Table S3.** Cartesian coordinates of QM region atoms for S<sub>0</sub> (enol and keto forms) states for TS-OMe in its ONIOM model, simulated by using the ONIOM-EE(BMK/6-31G(d,p):UFF) approach.

| enol |             |             | keto        |   |             |             |             |
|------|-------------|-------------|-------------|---|-------------|-------------|-------------|
| N    | -0.05415700 | 0.11222600  | -0.33538800 | N | -0.04993800 | 0.10272700  | -0.33757400 |
| O    | -0.03922300 | 5.64523600  | 0.36610800  | O | -0.04370500 | 5.63533500  | 0.36632000  |
| C    | -1.09347100 | -2.05800500 | -0.53882800 | C | -1.08462400 | -2.06914300 | -0.54305200 |
| H    | -0.13509300 | -2.55100400 | -0.48023700 | H | -0.12513500 | -2.55932100 | -0.48449200 |
| C    | -2.47879900 | -0.03298200 | -0.51511600 | C | -2.47443100 | -0.04716800 | -0.51969000 |
| H    | -2.56535000 | 1.04461100  | -0.43206200 | H | -2.56335000 | 1.03024800  | -0.43666200 |
| C    | 1.25401200  | -0.46885900 | -0.27841500 | C | 1.25986100  | -0.47510200 | -0.27860900 |
| O    | -2.08038500 | -4.16518800 | -0.81057800 | O | -2.06685500 | -4.17869500 | -0.81501700 |
| H    | -2.97286400 | -4.55133200 | -0.94576100 | H | -2.95836700 | -4.56608200 | -0.95206700 |
| C    | -1.18835200 | -0.65136800 | -0.45764700 | C | -1.18241200 | -0.66280900 | -0.46117800 |
| C    | -0.11006300 | 1.53496400  | -0.18829300 | C | -0.10853200 | 1.52538600  | -0.19012700 |
| C    | -0.06199500 | 4.32418400  | 0.11750000  | C | -0.06445300 | 4.31436600  | 0.11709400  |
| C    | -0.37548500 | 2.11190900  | 1.06251800  | C | -0.37558700 | 2.10132000  | 1.06081400  |
| H    | -0.60405200 | 1.46529800  | 1.90428300  | H | -0.60380700 | 1.45372600  | 1.90192400  |
| O    | 5.08016200  | -2.05250800 | 0.03186900  | O | 5.09223500  | -2.04254200 | 0.03687400  |
| C    | 0.16207400  | 2.35750500  | -1.28186800 | C | 0.16353300  | 2.34867300  | -1.28309800 |
| H    | 0.37782100  | 1.89407800  | -2.24061100 | H | 0.38114400  | 1.88599100  | -2.24180100 |
| C    | -0.33763700 | 3.49195900  | 1.22069400  | C | -0.33963500 | 3.48133300  | 1.21982700  |
| H    | -0.50184400 | 3.94144900  | 2.19197400  | H | -0.50484800 | 3.93042900  | 2.19118700  |
| C    | 0.17653100  | 3.75062200  | -1.14299400 | C | 0.17576800  | 3.74173900  | -1.14352200 |
| H    | 0.39227700  | 4.37560400  | -1.99950100 | H | 0.39133900  | 4.36740900  | -1.99957800 |
| C    | 1.84470100  | -1.02852900 | -1.41509500 | C | 1.85484000  | -1.03129400 | -1.41472300 |
| H    | 1.28396600  | -1.04926700 | -2.34746600 | H | 1.29610600  | -1.05346400 | -2.34822300 |
| C    | 3.13264700  | -1.58104300 | -1.35705300 | C | 3.14510000  | -1.57828100 | -1.35491400 |
| H    | 3.56934100  | -2.01274100 | -2.25188500 | H | 3.58537400  | -2.00683300 | -2.24951000 |
| C    | -3.51531800 | -2.22928600 | -0.81554300 | C | -3.50594300 | -2.24588100 | -0.82095300 |
| C    | -3.59683600 | -0.82129700 | -0.69775600 | C | -3.59057100 | -0.83768000 | -0.70350100 |
| H    | -4.57952500 | -0.35519900 | -0.75645900 | H | -4.57405300 | -0.37318100 | -0.76362200 |
| C    | 3.24228400  | -0.99782000 | 1.00594700  | C | 3.24797200  | -0.99713800 | 1.00887500  |
| H    | 3.80887500  | -0.99094300 | 1.93325800  | H | 3.81303400  | -0.98839300 | 1.93710100  |
| C    | -2.22963200 | -2.84196300 | -0.71794000 | C | -2.21871800 | -2.85563400 | -0.72268100 |
| C    | 3.83865100  | -1.56336900 | -0.13976800 | C | 3.84876800  | -1.55895500 | -0.13638500 |
| C    | 1.96381200  | -0.45586400 | 0.93360500  | C | 1.96744100  | -0.46037900 | 0.93473100  |
| H    | 1.50373200  | -0.00384500 | 1.80838800  | H | 1.50420100  | -0.01069700 | 1.80903100  |
| C    | 0.29007700  | 6.53103400  | -0.68415100 | C | 0.28252600  | 6.52233900  | -0.68387100 |
| H    | 0.34463600  | 7.52330300  | -0.23043300 | H | 0.33560100  | 7.51454700  | -0.22982600 |
| H    | -0.48053200 | 6.52732800  | -1.46851800 | H | -0.48905900 | 6.51737200  | -1.46727000 |
| H    | 1.26736500  | 6.28953200  | -1.12388200 | H | 1.25981100  | 6.28310000  | -1.12477300 |
| O    | -4.68629100 | -4.25747400 | -1.18263200 | O | -4.67317500 | -4.27700800 | -1.18623800 |
| C    | 5.73889200  | -2.63685800 | -1.07346800 | C | 5.75643400  | -2.62126000 | -1.06812500 |
| H    | 5.89206800  | -1.90760000 | -1.88160900 | H | 5.91189300  | -1.88806000 | -1.87230500 |
| H    | 5.17686000  | -3.49408100 | -1.47027700 | H | 5.19768800  | -3.47760800 | -1.47127500 |
| H    | 6.70677400  | -2.97953700 | -0.69999100 | H | 6.72308800  | -2.96431400 | -0.69188000 |
| C    | -4.69036900 | -3.03050800 | -1.06929400 | C | -4.67884100 | -3.04953500 | -1.07403600 |
| H    | -5.64101600 | -2.46926600 | -1.17555700 | H | -5.63047600 | -2.49024600 | -1.18112600 |

**Table S4.** Cartesian coordinates of QM region atoms for S<sub>1</sub> (enol\* and keto\* forms) states for TS-OME in its ONIOM model, simulated by using the ONIOM-EE((TD)BMK/6-31G(d,p):UFF approach.

| enol* |             |             | keto*       |   |             |             |             |
|-------|-------------|-------------|-------------|---|-------------|-------------|-------------|
| N     | -0.06885500 | 0.10860400  | -0.24392600 | N | -0.04325000 | 0.13443200  | -0.26714200 |
| O     | -0.02806800 | 5.62633100  | 0.30588400  | O | -0.02823900 | 5.66800300  | 0.33441700  |
| C     | -1.14211700 | -2.08042200 | -0.37761200 | C | -1.08536900 | -2.03689700 | -0.42227000 |
| H     | -0.20655100 | -2.56022300 | -0.12219600 | H | -0.14581200 | -2.51120900 | -0.17136000 |
| C     | -2.50926500 | -0.06194500 | -0.63285900 | C | -2.46344400 | -0.01893200 | -0.55684300 |
| H     | -2.59949700 | 1.02064600  | -0.64956800 | H | -2.59567200 | 1.05576700  | -0.51957900 |
| C     | 1.20293700  | -0.44122800 | -0.31979600 | C | 1.25513700  | -0.44765900 | -0.25906300 |
| O     | -2.10119900 | -4.21339800 | -0.63076300 | O | -2.03752600 | -4.16147800 | -0.69498800 |
| H     | -3.01682100 | -4.58135900 | -0.82254500 | H | -3.63870900 | -4.66135400 | -0.99239300 |
| C     | -1.26406000 | -0.66601400 | -0.42354600 | C | -1.19718200 | -0.59313900 | -0.42246400 |
| C     | -0.10083100 | 1.50903200  | -0.10090800 | C | -0.08823200 | 1.55662200  | -0.14224800 |
| C     | -0.02931900 | 4.30771500  | 0.09865700  | C | -0.04286600 | 4.34581400  | 0.10774400  |
| C     | -0.56100600 | 2.14012100  | 1.07237200  | C | -0.42457600 | 2.15422600  | 1.08108200  |
| H     | -0.93347000 | 1.53287300  | 1.89211700  | H | -0.70463800 | 1.52589000  | 1.92102100  |
| O     | 4.99639900  | -2.10086200 | -0.13112400 | O | 5.06359700  | -2.06666500 | -0.01634000 |
| C     | 0.37958900  | 2.29376500  | -1.16987500 | C | 0.25140100  | 2.35319700  | -1.23880500 |
| H     | 0.71714400  | 1.78849400  | -2.07156500 | H | 0.51429200  | 1.87019800  | -2.17641500 |
| C     | -0.46188000 | 3.51552500  | 1.18945600  | C | -0.37079800 | 3.53503400  | 1.21374400  |
| H     | -0.68698900 | 4.01214200  | 2.12093600  | H | -0.56100900 | 4.00516000  | 2.16895100  |
| C     | 0.37389200  | 3.68575900  | -1.09877900 | C | 0.25360800  | 3.74791800  | -1.12987800 |
| H     | 0.70260800  | 4.27594000  | -1.94427200 | H | 0.50830800  | 4.35580100  | -1.98788700 |
| C     | 1.63996700  | -1.27013700 | -1.38733600 | C | 1.76586000  | -1.13098600 | -1.37179800 |
| H     | 0.96682900  | -1.45352800 | -2.22117600 | H | 1.15358800  | -1.22226900 | -2.26686600 |
| C     | 2.92285800  | -1.81371400 | -1.37835700 | C | 3.05140600  | -1.68952100 | -1.33686800 |
| H     | 3.25817300  | -2.40635500 | -2.22222100 | H | 3.43463300  | -2.20143600 | -2.21333600 |
| C     | -3.53612400 | -2.29585800 | -0.87784300 | C | -3.50475800 | -2.27896200 | -0.86235800 |
| C     | -3.63648100 | -0.87198300 | -0.82945900 | C | -3.57226600 | -0.87682900 | -0.77373400 |
| H     | -4.61321000 | -0.41688600 | -0.97340900 | H | -4.55069000 | -0.41157400 | -0.89513100 |
| C     | 3.31672800  | -0.81960700 | 0.83117000  | C | 3.30061600  | -0.90171800 | 0.96020700  |
| H     | 3.97497800  | -0.70580800 | 1.68893100  | H | 3.91584100  | -0.83557200 | 1.85383900  |
| C     | -2.24884600 | -2.88907600 | -0.63214400 | C | -2.20421300 | -2.91239100 | -0.66982600 |
| C     | 3.76760100  | -1.60748100 | -0.26111200 | C | 3.82428600  | -1.57833400 | -0.16570900 |
| C     | 2.08641600  | -0.20419900 | 0.77653200  | C | 2.04167000  | -0.32450100 | 0.90415600  |
| H     | 1.73333900  | 0.40818100  | 1.60258500  | H | 1.63866200  | 0.21469500  | 1.75786400  |
| C     | 0.34884800  | 6.49734800  | -0.74682400 | C | 0.32064200  | 6.54134100  | -0.72145600 |
| H     | 0.34571700  | 7.50013900  | -0.31569700 | H | 0.35587400  | 7.53977000  | -0.28062800 |
| H     | -0.37218000 | 6.44820500  | -1.57425700 | H | -0.43132100 | 6.51892300  | -1.52298000 |
| H     | 1.35770300  | 6.27136900  | -1.11462800 | H | 1.31024500  | 6.30125300  | -1.13277500 |
| O     | -4.56770100 | -4.42785200 | -1.17459000 | O | -4.58306100 | -4.42524700 | -1.17237000 |
| C     | 5.54537300  | -2.89580000 | -1.17029700 | C | 5.66776900  | -2.74326500 | -1.10283700 |
| H     | 5.59692800  | -2.33367900 | -2.11075300 | H | 5.76992000  | -2.08431700 | -1.97563800 |
| H     | 4.95054800  | -3.80637500 | -1.32263800 | H | 5.08965800  | -3.63238400 | -1.39071300 |
| H     | 6.55129600  | -3.16005500 | -0.83855300 | H | 6.65661100  | -3.04762000 | -0.75265700 |
| C     | -4.64705700 | -3.16609200 | -1.16939000 | C | -4.63463300 | -3.09130900 | -1.12615500 |
| H     | -5.60635200 | -2.67414000 | -1.41070800 | H | -5.61612100 | -2.66067100 | -1.30461200 |

**Table S5.** Key Geometry parameters calculated by (TD)BMK/6-31G(d,p)+PCM method in acetonitrile solution and by ONIOM-EE((TD)-BMK/6-31G(d,p):UFF) method in aggregated crystal for both TS and TS-OMe. Dihedral angles are in degrees ( $^\circ$ ) and bond lengths are in Angstrom ( $\text{\AA}$ ), and relative energies are in  $\text{kcal}\cdot\text{mol}^{-1}$ . The  $0.0 \text{ kcal}\cdot\text{mol}^{-1}$  ( $\Delta E$ ) is chosen as zero point of energy for the lower minimum in either  $S_0$  or  $S_1$  states, separately.

| structure   |    | geometric parameters |          |          | $\Delta E$ (opt) |
|-------------|----|----------------------|----------|----------|------------------|
|             |    | $\theta$             | R(H1-O1) | R(H1-O2) |                  |
| in solution |    |                      |          |          |                  |
| TS          | E  | 154.90               | 0.98     | 1.78     | 0.0              |
|             | E* | 121.36               | 0.99     | 1.66     | 0.0              |
|             | K* | 105.50               | 1.57     | 1.01     | 3.1              |
| TS-OMe      | E  | -160.21              | 0.98     | 1.78     | 0.0              |
|             | E* | -103.22              | 1.00     | 1.64     | 0.0              |
|             | K* | -98.77               | 1.55     | 1.02     | 2.6              |
| in crystal  |    |                      |          |          |                  |
| TS          | E  | -162.24              | 0.98     | 1.77     | 0.0              |
|             | E* | -142.36              | 1.00     | 1.66     | 0.0              |
|             | K* | -152.74              | 1.69     | 0.99     | 2.6              |
| TS-OMe      | E  | -177.07              | 0.98     | 1.75     | 0.0              |
|             | E* | -171.72              | 1.01     | 1.60     | 1.7              |
|             | K* | -174.59              | 1.70     | 0.99     | 0.0              |

**Table S6.** Calculated absorption and emission wavelength ( $\lambda$ , nm) for the TS and TS-OMe monomers and dimers in crystal in comparison with experimentally measured wavelength. The corresponding Stokes shifts (nm) in both calculation and experiment are compared.

| structure |         | Cal.       |          |        | Expt       |          |        |
|-----------|---------|------------|----------|--------|------------|----------|--------|
|           |         | absorption | emission | Stokes | absorption | emission | Stokes |
| TS        | monomer | 315        | 380      | 65     | 366        | 493      | 127    |
|           | dimer   | 337        | 456      | 119    |            |          |        |
| TS-OMe    | monomer | 292        | 457      | 165    | 367        | 533      | 166    |
|           | dimer   | 292        | 459      | 167    |            |          |        |

**Table S7.** Decomposition interaction energies calculated by the EDA-FF approach for the representative dimers of TS and TS-OMe in crystal. The energy unit is kJ/mol.

| TS     | Elec. | Rep.  | Disp.  | Total  | TS-OMe | Elec.  | Rep.  | Disp.   | Total  |
|--------|-------|-------|--------|--------|--------|--------|-------|---------|--------|
| dimer1 | -0.96 | 28.63 | -43.76 | -16.09 | dimer1 | -18.73 | 62.55 | -100.99 | -57.18 |
| dimer2 | -4.51 | 46.41 | -77.74 | -35.83 | dimer2 | -7.85  | 50.82 | -74.64  | -31.67 |
| dimer3 | -0.15 | 22.16 | -40.28 | -18.27 | dimer3 | -6.95  | 46.05 | -69.82  | -30.72 |
| dimer4 | -6.03 | 45.76 | -54.96 | -15.23 | dimer4 | -6.86  | 14.76 | -29.60  | -21.69 |
| dimer5 | -4.63 | 14.40 | -23.77 | -14.00 | dimer5 | -11.22 | 45.57 | -84.87  | -50.51 |
| dimer6 | -1.72 | 22.68 | -44.62 | -23.65 | dimer6 | -19.00 | 20.02 | -35.56  | -34.55 |
| dimer7 | -4.57 | 35.92 | -68.61 | -37.26 | dimer7 | -6.65  | 14.13 | -28.90  | -21.42 |
| dimer8 | -13.4 | 47.84 | -74.06 | -39.61 | dimer8 | -3.43  | 22.26 | -27.02  | -8.19  |
| dimer9 | -4.73 | 13.83 | -23.99 | -14.89 |        |        |       |         |        |

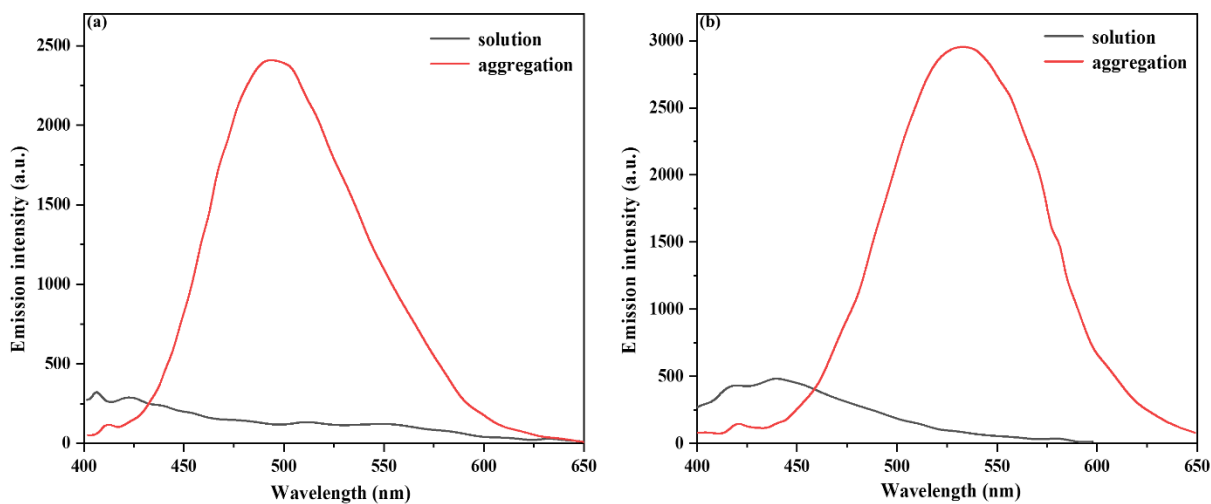

**Fig. S1** The experimentally measured emission spectra in acetonitrile/water mixtures with  $f_w$  of 0% (in solution) and 99% (in aggregation), respectively for TS (left panel) and TS-OMe (right panel).<sup>23</sup>

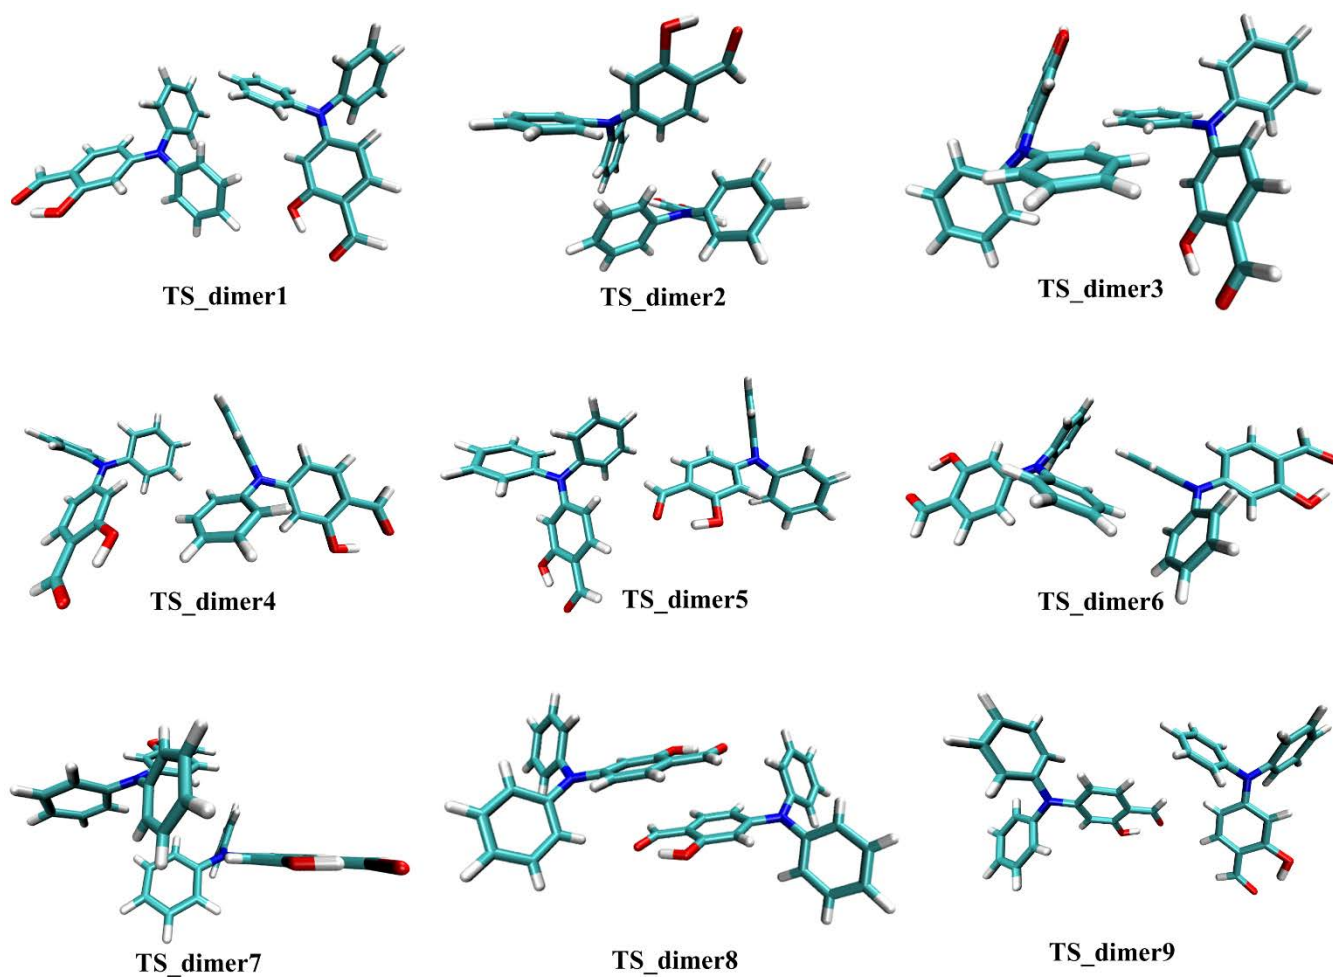

**Fig. S2** The geometries of all the representative dimers of TS in crystal.



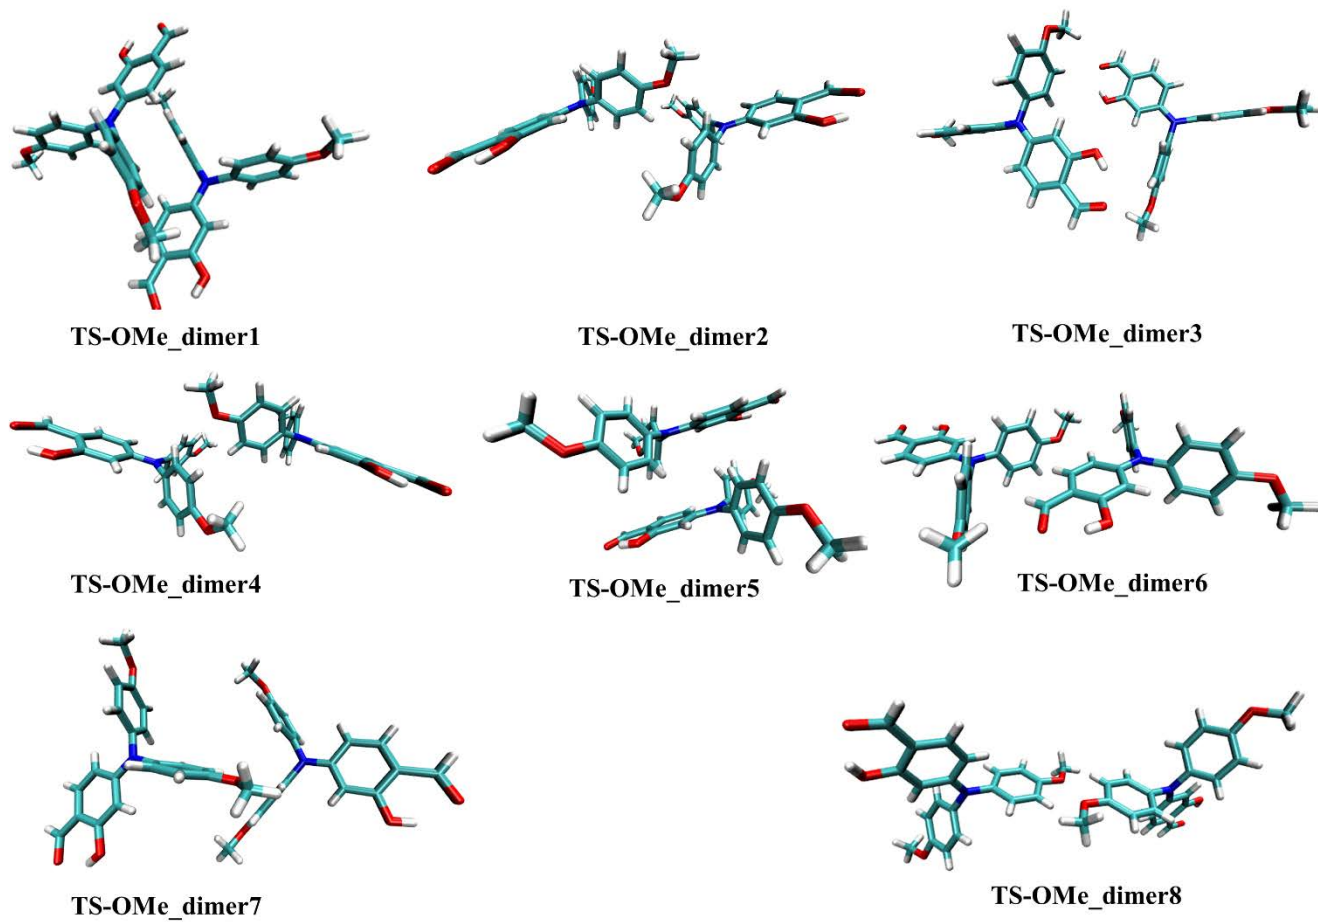

**Fig. S3** The geometries of all the representative dimers of TS-OMe in crystal.



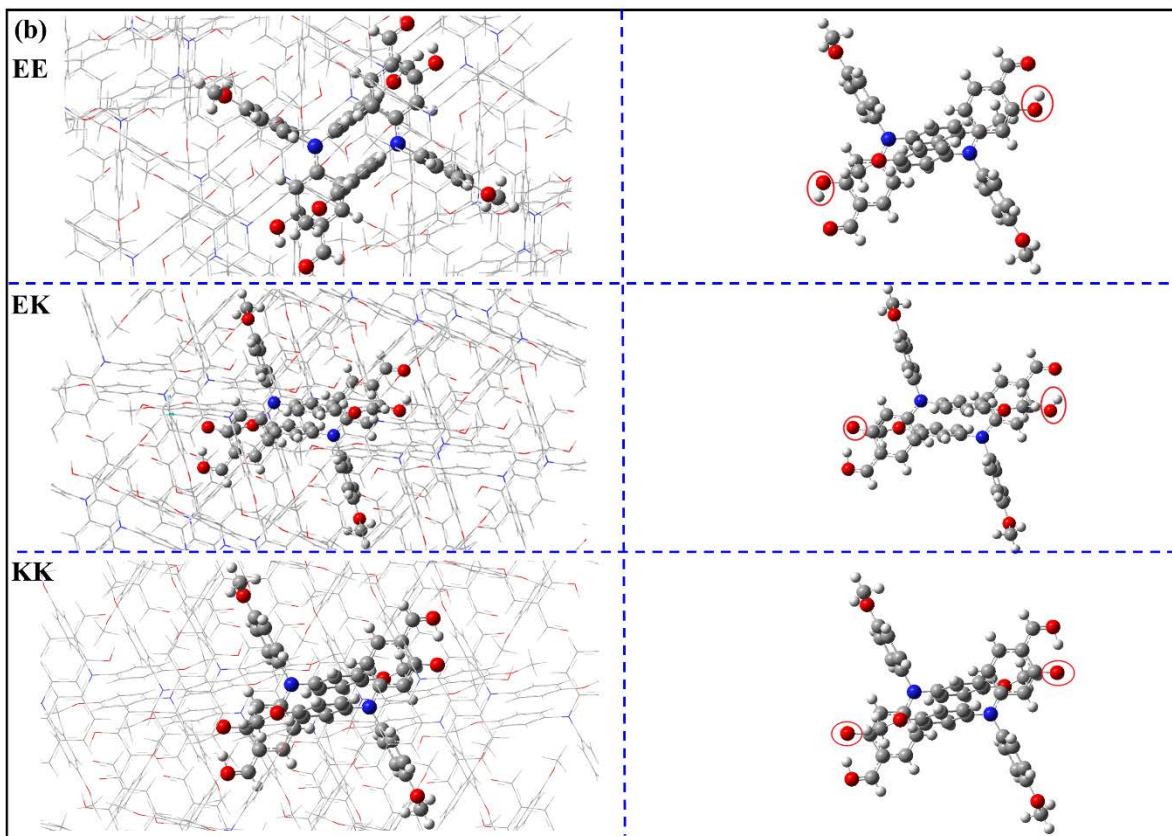

**Fig. S4** Three different dimeric structures in the QM region optimized from ONIOM approach in crystal (a) TS and (b) TS-OMe.

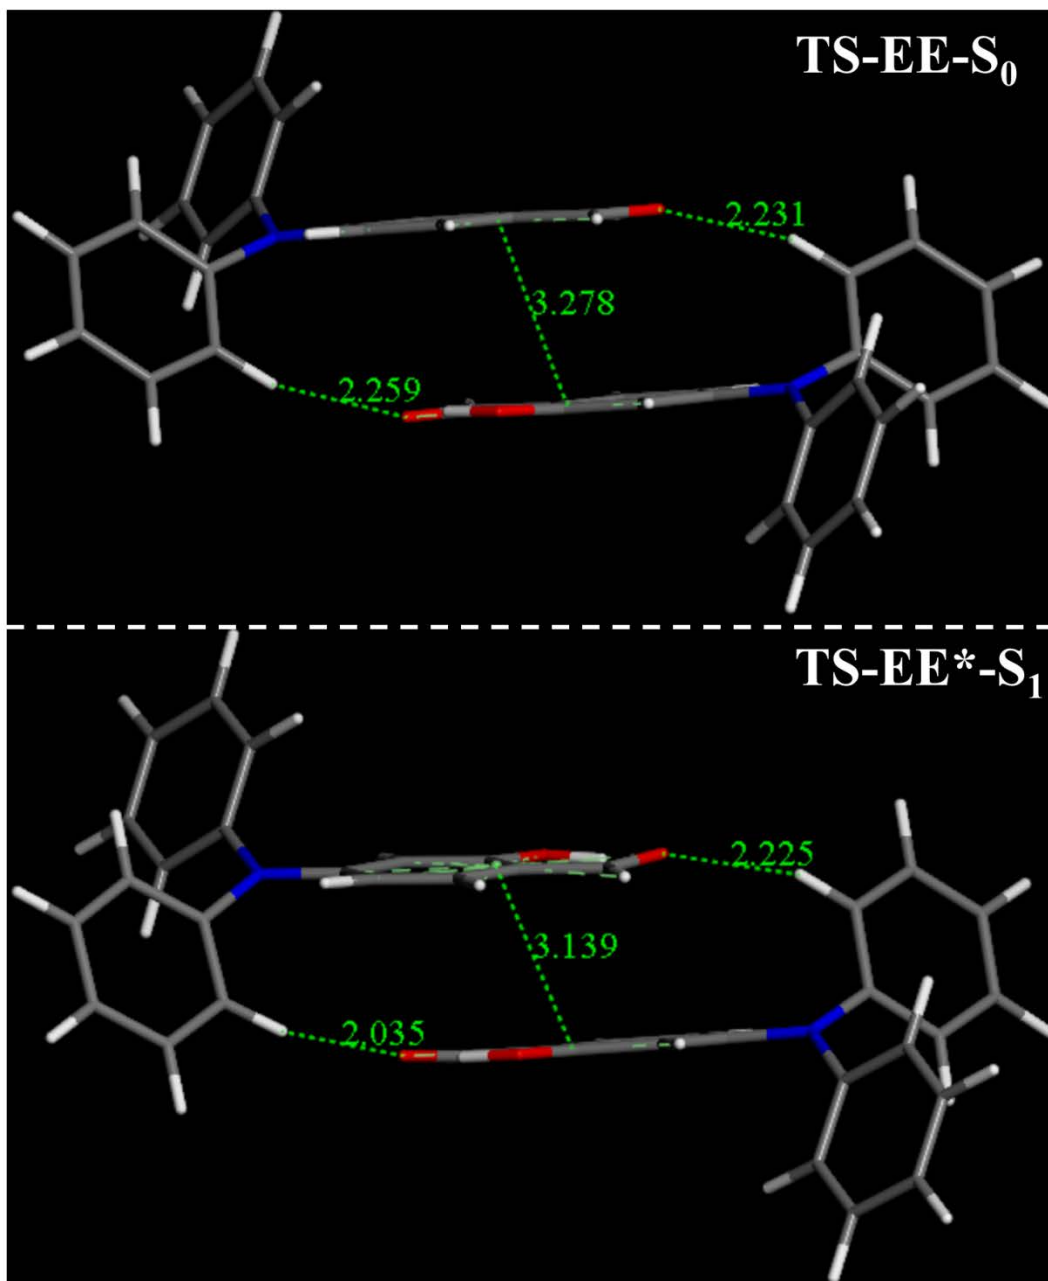

**Fig. S5** Calculated C-H···O hydrogen bonds and  $\pi\cdots\pi$  interactions with signed distances ( $\text{\AA}$ ) between the two E-formed TS monomers within the EE (upper panel in  $S_0$  state) and EE\* (lower panel in  $S_1$  state) dimers in the QM region.
